# Supplementary material for: High-Temperature Interactions of Silicon-Aluminum Oxynitrides (Sialons) with Sodium Fluoride
Source: MDPI journal article supplement (doi:10.3390/inorganics10090140), 2022-09-16
Supplement: s1 [file s1]

# High-Temperature Interactions of Silicon-Aluminum Oxynitrides (SiAlONs) with Sodium Fluoride NaF

Nailya S. Akhmadullina \*, Vladimir P. Sirotinkin, Nikolay A. Ovsyannikov, Anton S. Lysenkov and Yury F. Kargin

A.A. Baikov Institute of Metallurgy and Material Science, Russian Academy of Sciences, Leninsky Avenue 49, 119334 Moscow, Russia

\* Correspondence: nakhmadullina@mail.ru; Tel.: +7-919-109-03-32

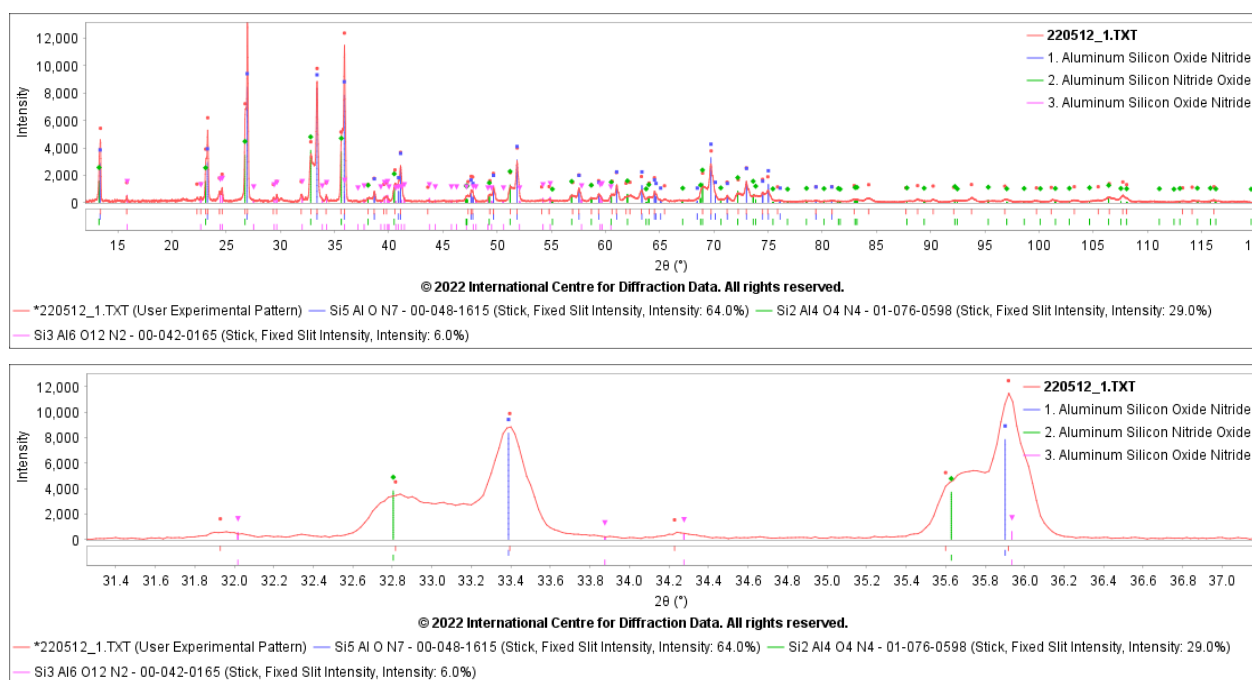

**Figure S1.** Powder X-Ray Diffraction pattern of the sample SiAlON-1:0.5%NaF.

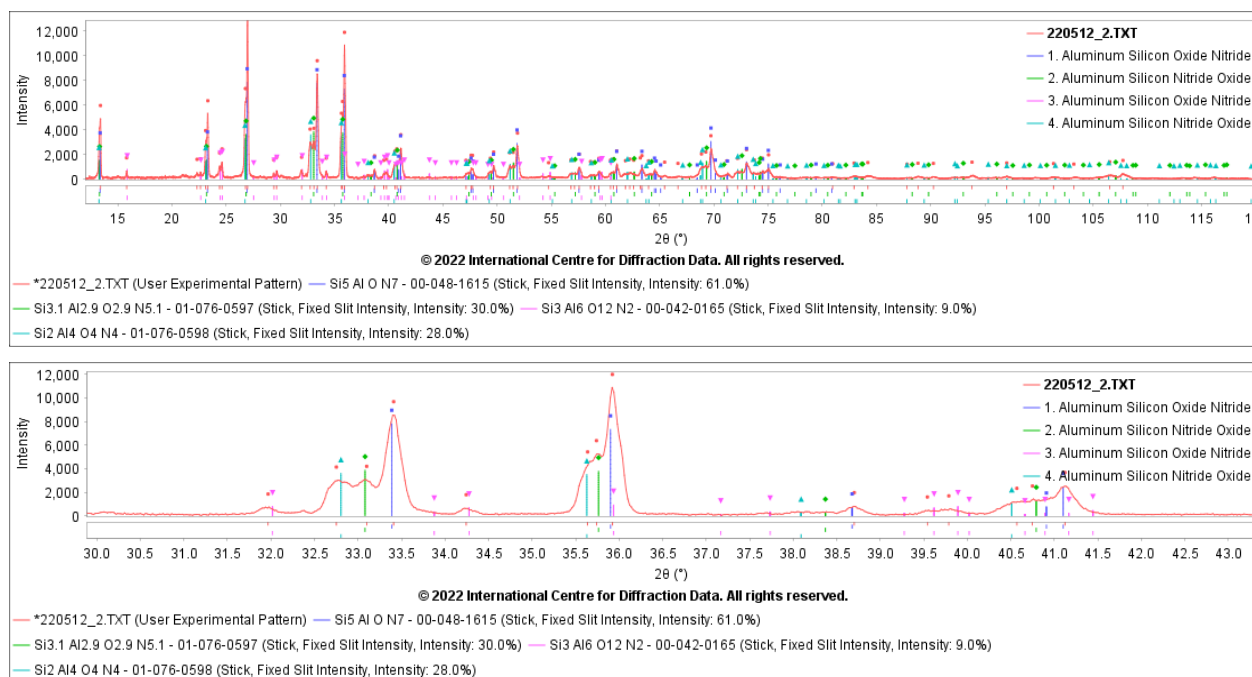

**Figure S2.** Powder X-Ray Diffraction pattern of the sample SiAlON-1:2.0%NaF.

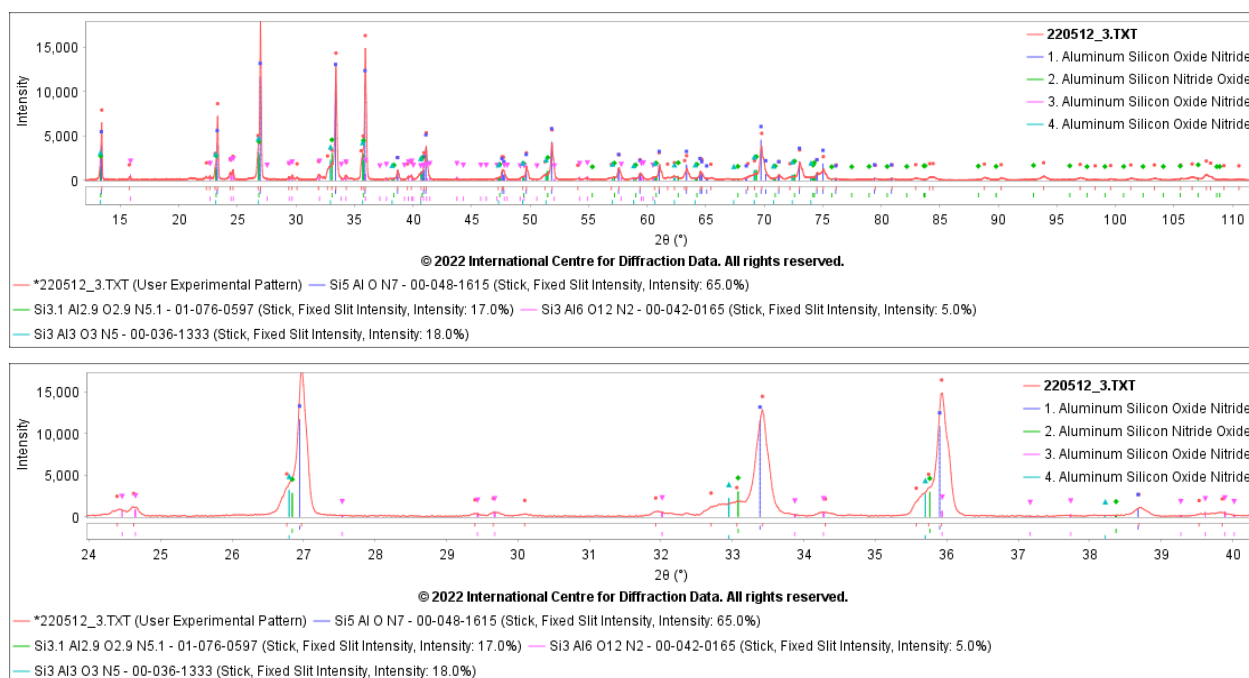

**Figure S3.** Powder X-Ray Diffraction pattern of the sample **SiAlON-2:0.5%NaF**.

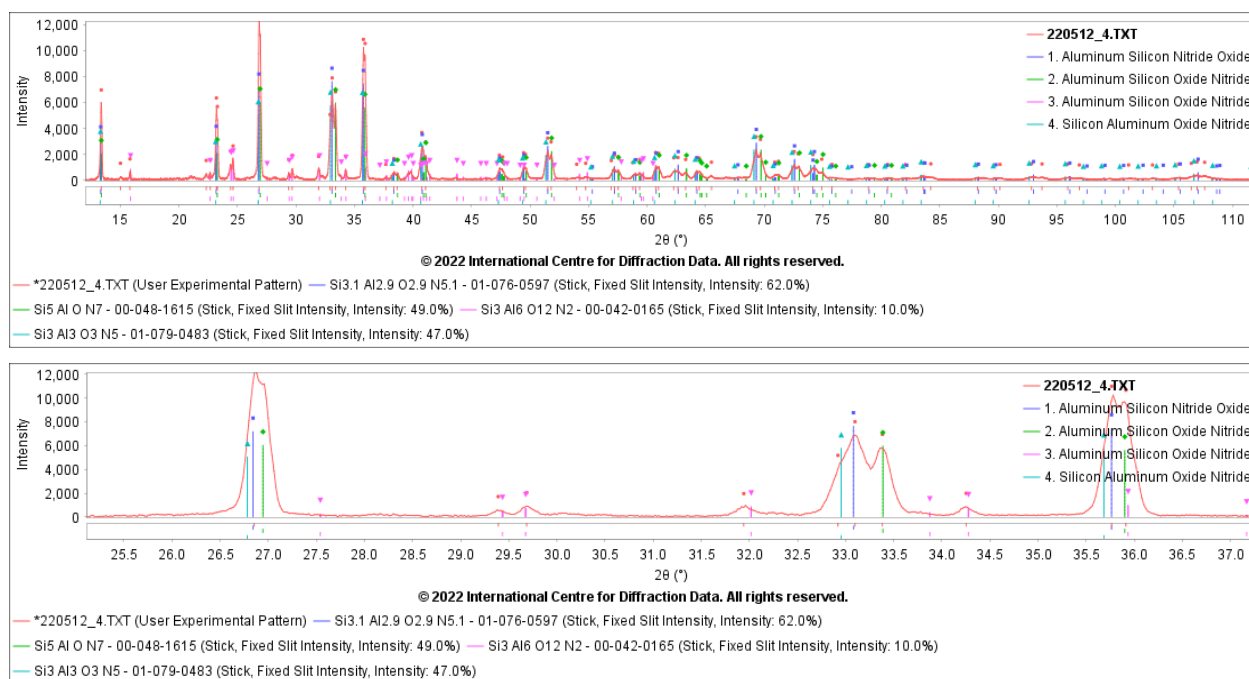

**Figure S4.** Powder X-Ray Diffraction pattern of the sample **SiAlON-2:2.0%NaF**.

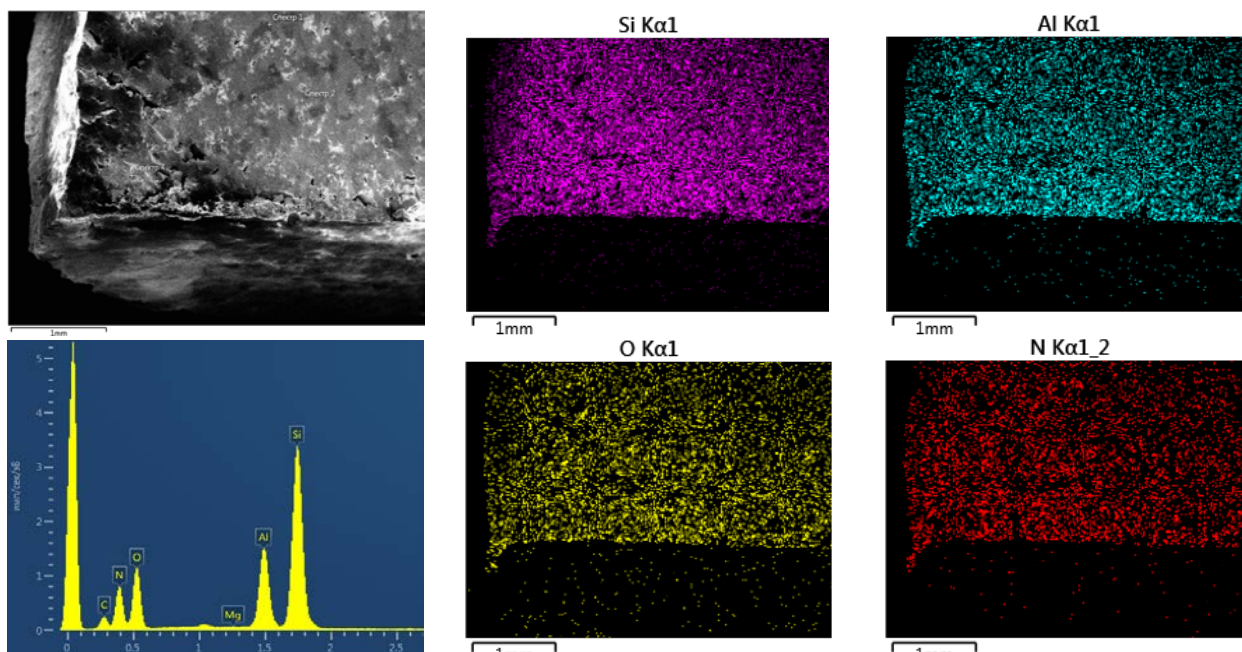

**Figure S5.** SEM images and elemental maps according to EDX spectroscopy data for the sample **SiAlON-1:0.5%NaF**.

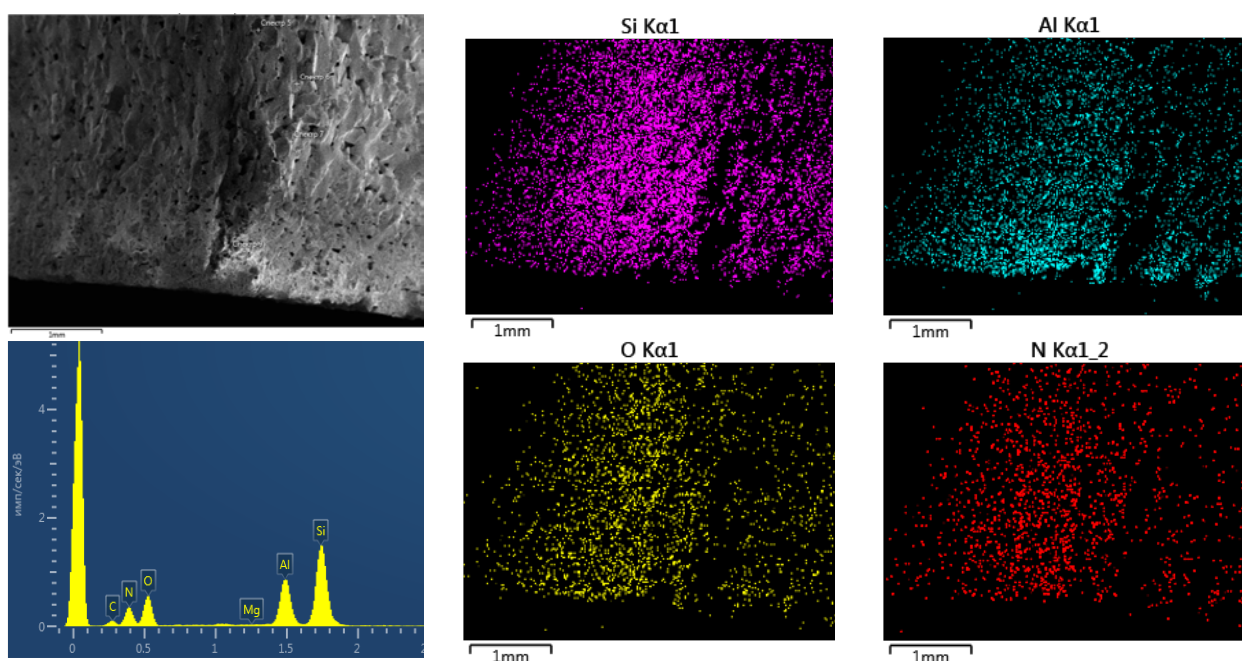

**Figure S6.** SEM images and elemental maps according to EDX spectroscopy data for the sample **SiAlON-1:2.0%NaF**.

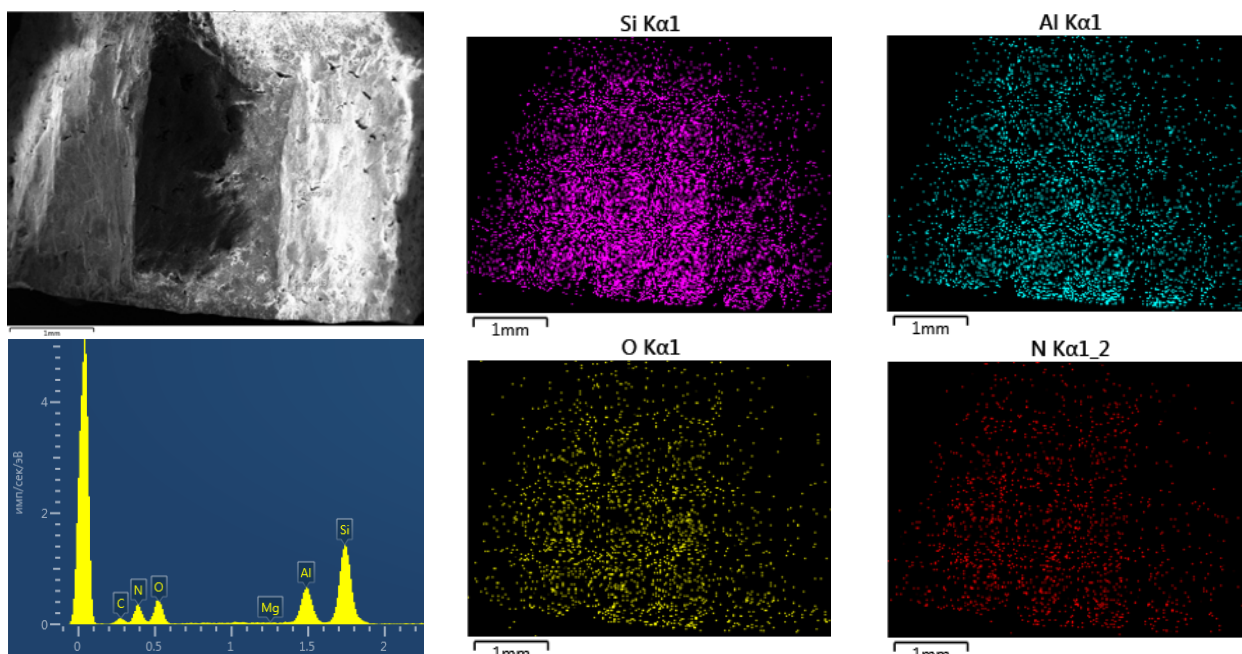

**Figure S7.** SEM images and elemental maps according to EDX spectroscopy data for the sample SiAlON-2:0.5%NaF.

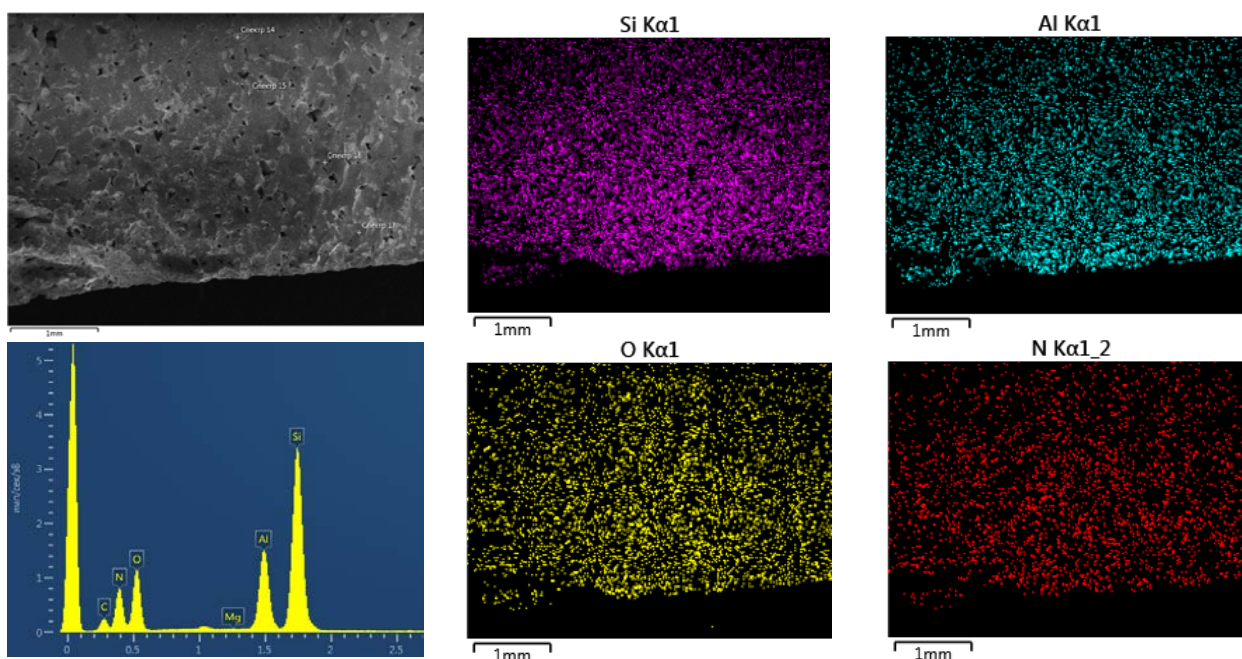

**Figure S8.** SEM images and elemental maps according to EDX spectroscopy data for the sample SiAlON-2:2.0%NaF.
